# Supplementary material for: Cooperative Adaptive Responses in Gene Regulatory Networks with Many Degrees of Freedom
Source: PubMed Central journal article supplement (PMC3616990; doi:10.1371/journal.pcbi.1003001), 2013-04-04

Figure S1

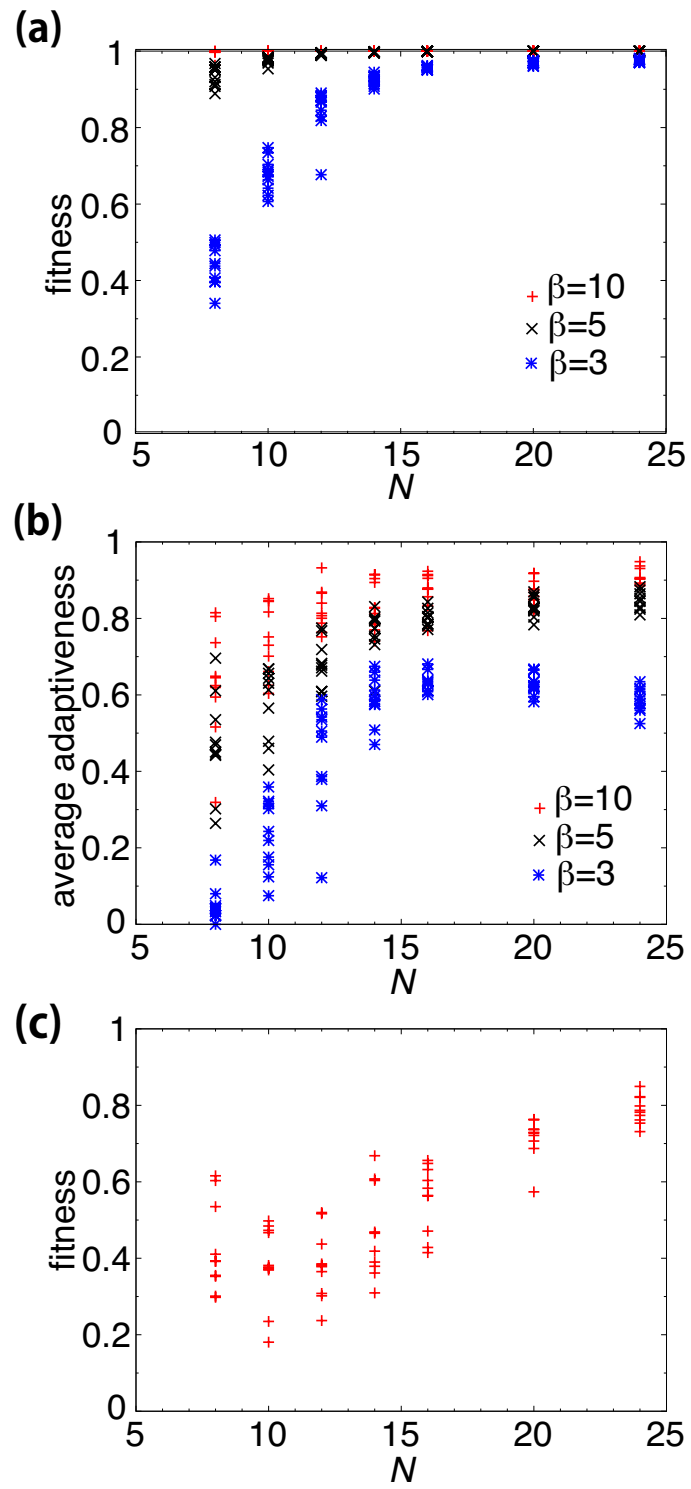

Supplement: pcbi.1003001.s001.pdf [file pcbi.1003001.s001.pdf]
