# Supplementary material for: Cooperative Adaptive Responses in Gene Regulatory Networks with Many Degrees of Freedom
Source: PubMed Central journal article supplement (PMC3616990; doi:10.1371/journal.pcbi.1003001), 2013-04-04

Figure S2

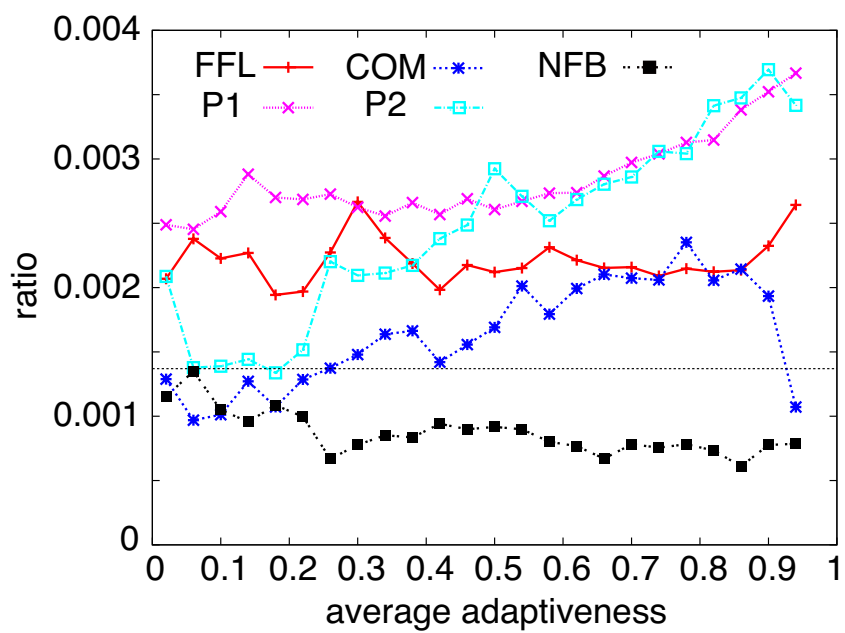

cooperative network

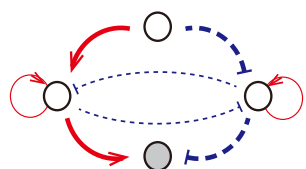

FFL (+)

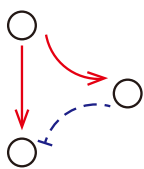

P1 (x)

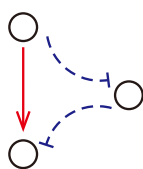

COM (\*)

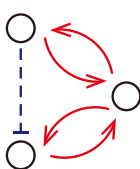

P2 (□)

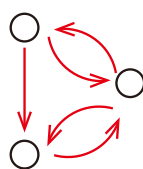

NFB (■)

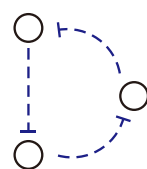

Supplement: pcbi.1003001.s002.pdf [file pcbi.1003001.s002.pdf]
